# Supplementary material for: High-affinity CD16-polymorphism and Fc-engineered antibodies enable activity of CD16-chimeric antigen receptor-modified T cells for cancer therapy
Source: PubMed Central journal article supplement (PMC6325122; doi:10.1038/s41416-018-0341-1), 2018-11-15

**SUPPLEMENTARY FIGURE 1**

**A**

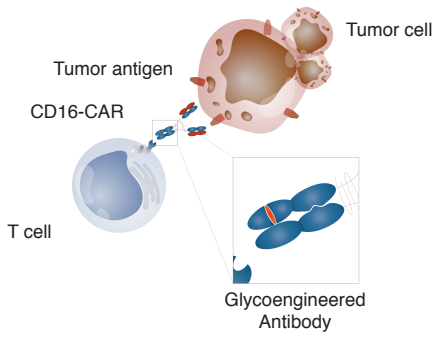

**B**

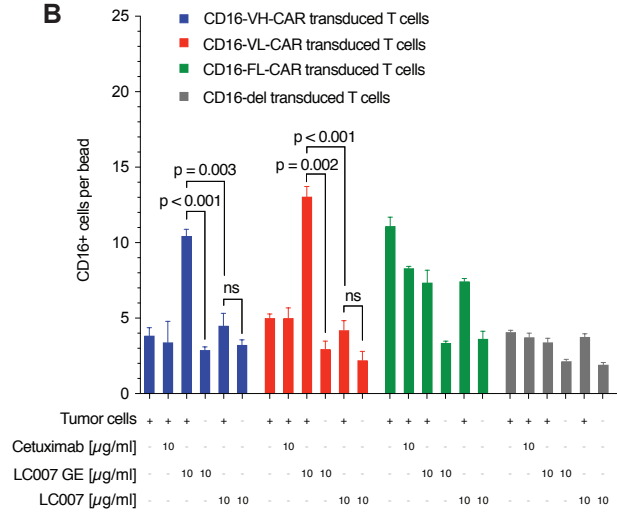

Supplement: 41416_2018_341_MOESM1_ESM.pdf [file 41416_2018_341_MOESM1_ESM.pdf]
