# Supplementary material for: High-affinity CD16-polymorphism and Fc-engineered antibodies enable activity of CD16-chimeric antigen receptor-modified T cells for cancer therapy
Source: PubMed Central journal article supplement (PMC6325122; doi:10.1038/s41416-018-0341-1), 2018-11-15
Supplement: 41416_2018_341_MOESM3_ESM.pdf [file 41416_2018_341_MOESM3_ESM.pdf]

**Figure 1 B**

|                                   | CD16-VH-CAR |            | CD16-VL-CAR |            | CD16-FL-CAR |            |
|-----------------------------------|-------------|------------|-------------|------------|-------------|------------|
|                                   | p-value     | fold diff. | p-value     | fold diff. | p-value     | fold diff. |
| no Ab vs [0.1] Cetuximab          | 0,01        | 14,11      | 0,003       | 8,37       | >0,05       | 1,30       |
| no Ab vs [1] Cetuximab            | 0,001       | 14,77      | 0,001       | 9,57       | >0,05       | 1,05       |
| no Ab vs [10] Cetuximab           | <0,001      | 22,04      | 0,001       | 14,26      | 0,02        | 1,43       |
| [0.1] Cetuximab vs [1] Cetuximab  | >0,05       | 1,05       | >0,05       | 1,14       | >0,05       | 1,24       |
| [0.1] Cetuximab vs [10] Cetuximab | >0,05       | 1,56       | 0,04        | 1,70       | >0,05       | 1,09       |
| [1] Cetuximab vs [10] Cetuximab   | 0,05        | 1,49       | >0,05       | 1,49       | 0,03        | 1,36       |

|          | Panitumumab |            | Cetuximab w/o tumor cells |            | [0.1] Cetuximab |            | [1] Cetuximab |            | [10] Cetuximab |            |
|----------|-------------|------------|---------------------------|------------|-----------------|------------|---------------|------------|----------------|------------|
|          | p-value     | fold diff. | p-value                   | fold diff. | p-value         | fold diff. | p-value       | fold diff. | p-value        | fold diff. |
| VL vs VH | >0,05       | 1,05       | >0,05                     | 1,30       | >0,05           | 0,79       | >0,05         | 0,86       | >0,05          | 0,86       |

**Figure 2 B**

|                               | CD16-VH-CAR |            | CD16-VL-CAR |            | CD16-FL-CAR |            |
|-------------------------------|-------------|------------|-------------|------------|-------------|------------|
|                               | p-value     | fold diff. | p-value     | fold diff. | p-value     | fold diff. |
| GA101 [10] vs Rituximab       | 0,002       | 1,24       | <0,001      | 5,10       | 0,05        | 1,17       |
| GA101 [0.1] vs GA101 GE [0.1] | 0,002       | 3,8        | 0,005       | 3,61       | 0,007       | 6,91       |
| GA101 [1] vs GA101 GE [1]     | 0,003       | 2,05       | 0,03        | 2,29       | 0,008       | 3,07       |
| GA101 [10] vs GA101 GE [10]   | <0,001      | 1,46       | 0,002       | 1,98       | <0,001      | 2,38       |

|                            | CD16-VH-CAR<br>with Rituximab |            | CD16-VL-CAR<br>with Rituximab |            |
|----------------------------|-------------------------------|------------|-------------------------------|------------|
|                            | p-value                       | fold diff. | p-value                       | fold diff. |
| CD16-FL-CAR with Rituximab | <0,001                        | 2,13       | >0,05                         | 1,00       |

|                                 | CD16-VL-CAR |            |
|---------------------------------|-------------|------------|
|                                 | p-value     | fold diff. |
| CD16-VH-CAR                     |             |            |
| GA101GE [0.1] vs GA101 GE [0.1] | 0,02        | 2,12       |
| GA101GE [1] vs GA101 GE [1]     | 0,02        | 2,30       |
| GA101GE [10] vs GA101 GE [10]   | 0,002       | 1,94       |

**Figure 2 C**

|               | CD16-VH-CAR<br>with GA101GE [1] |            | CD16-VL-CAR<br>with GA101GE [1] |            | CD16-FL-CAR<br>with GA101GE [1] |            |
|---------------|---------------------------------|------------|---------------------------------|------------|---------------------------------|------------|
|               | p-value                         | fold diff. | p-value                         | fold diff. | p-value                         | fold diff. |
| Rituximab     | >0,05                           | 2,09       | <0,001                          | 2,90       | 0,001                           | 4,22       |
| GA101 [1]     | >0,05                           | 1,11       | >0,05                           | 1,02       | >0,05                           | 1,20       |
| GA101 LALA[1] | 0,02                            | 13,17      | <0,001                          | 16,60      | 0,009                           | 6,33       |

|           | CD16-VH-CAR with<br>GA101 |            | CD16-VL-CAR with<br>GA101 |            | CD16-FL-CAR<br>with GA101 |            |
|-----------|---------------------------|------------|---------------------------|------------|---------------------------|------------|
|           | p-value                   | fold diff. | p-value                   | fold diff. | p-value                   | fold diff. |
| Rituximab | >0,05                     | 1,90       | <0,001                    | 2,90       | >0,05                     | 1,34       |

**Figure 3B**

|                               | CD16-VH-CAR |            | CD16-VL-CAR |            | CD16-FL-CAR |            |
|-------------------------------|-------------|------------|-------------|------------|-------------|------------|
|                               | p-value     | fold diff. | p-value     | fold diff. | p-value     | fold diff. |
| no Ab vs [0.1] LC007          | 0,03        | 0,76       | >0,05       | 0,85       | >0,05       | 0,94       |
| no Ab vs [1] LC007            | >0,05       | 1,13       | >0,05       | 1,06       | >0,05       | 1,16       |
| no Ab vs [10] LC007           | >0,05       | 1,01       | >0,05       | 0,87       | >0,05       | 1,01       |
| [0.1] LC007 vs [1] LC007      | 0,01        | 1,49       | 0,01        | 1,25       | >0,05       | 1,24       |
| [0.1] LC007 vs [10] LC007     | 0,03        | 1,34       | >0,05       | 1,02       | >0,05       | 1,08       |
| [1] LC007 vs [10] LC007       | >0,05       | 1,11       | 0,01        | 0,82       | >0,05       | 0,87       |
| no Ab vs [0.1] LC007GE        | 0,002       | 2,88       | 0,002       | 1,61       | >0,05       | 1,03       |
| no Ab vs [1] LC007GE          | <0,001      | 4,53       | <0,001      | 3,17       | >0,05       | 1,58       |
| no Ab vs [10] LC007GE         | <0,001      | 5,73       | <0,001      | 3,10       | 0,04        | 1,53       |
| [0.1] LC007GE vs [1] LC007GE  | 0,02        | 1,57       | <0,001      | 1,98       | >0,05       | 1,53       |
| [0.1] LC007GE vs [10] LC007GE | <0,001      | 1,99       | 0,002       | 1,93       | >0,05       | 1,48       |
| [1] LC007GE vs [10] LC007GE   | 0,05        | 1,27       | >0,05       | 0,98       | >0,05       | 0,97       |

|          | no Ab   |            | [0.1] LC007 |            | [1] LC007 |            | [10] LC007 |            | [0.1] LC007GE |            | [1] LC007GE |            | [10] LC007GE |            |
|----------|---------|------------|-------------|------------|-----------|------------|------------|------------|---------------|------------|-------------|------------|--------------|------------|
|          | p-value | fold diff. | p-value     | fold diff. | p-value   | fold diff. | p-value    | fold diff. | p-value       | fold diff. | p-value     | fold diff. | p-value      | fold diff. |
| VH vs FL | <0,001  | 1,95       | >0,05       | 1,58       | 0,002     | 1,89       | 0,01       | 1,96       | <0,001        | 5,44       | <0,001      | 5,61       | <0,001       | 7,34       |
| VL vs FL | <0,001  | 3,69       | <0,001      | 3,35       | <0,001    | 3,38       | <0,001     | 3,17       | <0,001        | 5,74       | <0,001      | 7,44       | <0,001       | 7,49       |
| VL vs VH | 0,002   | 1,89       | <0,001      | 2,12       | <0,001    | 1,78       | 0,003      | 1,62       | >0,05         | 1,05       | 0,02        | 0,76       | >0,05        | 1,02       |

**Figure 3C**

|                      | CD16-VH-CAR | CD16-VL-CAR | CD16-FL-CAR | CD16-del |
|----------------------|-------------|-------------|-------------|----------|
|                      | p-value     | p-value     | p-value     | p-value  |
| no Ab vs Cetuximab   | <0,001      | <0,001      | 0,003       | >0,05    |
| no Ab vs LC007       | >0,05       | >0,05       | >0,05       | >0,05    |
| no Ab vs LC007GE     | <0,001      | <0,001      | 0,002       | >0,05    |
| LC007 vs Cetuximab   | <0,001      | <0,001      | 0,003       | >0,05    |
| LC007 vs LC007GE     | <0,001      | <0,001      | 0,002       | >0,05    |
| LC007GE vs Cetuximab | >0,05       | >0,05       | >0,05       | >0,05    |

**Figure 4B**

|             | LC007                |            |                         |            |                        |            | LC007 GE             |            |                         |            |                        |            | no Ab                |            |                         |            |                        |            |
|-------------|----------------------|------------|-------------------------|------------|------------------------|------------|----------------------|------------|-------------------------|------------|------------------------|------------|----------------------|------------|-------------------------|------------|------------------------|------------|
|             | without vs with PBMC |            | without vs with IVIg 10 |            | without vs with IVIg 1 |            | without vs with PBMC |            | without vs with IVIg 10 |            | without vs with IVIg 1 |            | without vs with PBMC |            | without vs with IVIg 10 |            | without vs with IVIg 1 |            |
|             | p-value              | fold diff. | p-value                 | fold diff. | p-value                | fold diff. | p-value              | fold diff. | p-value                 | fold diff. | p-value                | fold diff. | p-value              | fold diff. | p-value                 | fold diff. | p-value                | fold diff. |
| CD16-VH-CAR | 0,03                 | 0,30       | <0,001                  | 1235,40    | 0,03                   | 2,10       | 0,01                 | 0,20       | 0,03                    | 67,90      | >0,05                  | 0,90       | >0,05                | 0,19       | 0,01                    | 318,60     | >0,05                  | 0,32       |
| CD16-VL-CAR | >0,05                | 0,87       | 0,001                   | 203,78     | 0,01                   | 2,82       | 0,01                 | 0,09       | 0,002                   | 16,98      | >0,05                  | 1,17       | >0,05                | 0,65       | >0,05                   | 189,21     | >0,05                  | 2,46       |
| CD16-FL-CAR | >0,05                | 0,89       | 0,04                    | 2,72       | >0,05                  | 0,79       | >0,05                | 0,69       | >0,05                   | 1,78       | >0,05                  | 0,76       | >0,05                | 1,62       | >0,05                   | 1,33       | 0,04                   | 0,44       |
| CD16-del    | >0,05                | 0,85       | >0,05                   | 1,53       | >0,05                  | 0,70       | 0,03                 | 2,42       | >0,05                   | 0,75       | >0,05                  | 0,73       | >0,05                | 1,03       | >0,05                   | 1,33       | >0,05                  | 1,16       |

**Figure 4C**

|             | LC007                   |                            | LC007 GE                |                            | no Ab                   |                            |
|-------------|-------------------------|----------------------------|-------------------------|----------------------------|-------------------------|----------------------------|
|             | without vs<br>with PBMC | without vs<br>with IVIg 10 | without vs<br>with PBMC | without vs<br>with IVIg 10 | without vs<br>with PBMC | without vs<br>with IVIg 10 |
|             | p-value                 | p-value                    | p-value                 | p-value                    | p-value                 | p-value                    |
| CD16-VH-CAR | >0,05                   | 0,004                      | <0,001                  | >0,05                      | 0,05                    | <0,001                     |
| CD16-VL-CAR | >0,05                   | 0,002                      | 0,003                   | >0,05                      | 0,02                    | <0,001                     |
| CD16-FL-CAR | >0,05                   | >0,05                      | >0,05                   | >0,05                      | <0,001                  | <0,001                     |
| CD16-del    | >0,05                   | >0,05                      | <0,001                  | >0,05                      | <0,05                   | 0,01                       |

**Supplementary Figure 1**

|                  | CD16-VH-CAR |            | CD16-VL-CAR |            | CD16-FL-CAR |            |
|------------------|-------------|------------|-------------|------------|-------------|------------|
|                  | p-value     | fold diff. | p-value     | fold diff. | p-value     | fold diff. |
| no Ab vs LC007   | >0,05       | 1,17       | >0,05       | 0,84       | 0,004       | 0,67       |
| no Ab vs LC007GE | <0,001      | 2,72       | <0,001      | 2,60       | >0,05       | 0,66       |
